# Supplementary material for: Sudachitin and Nobiletin Stimulate Lipolysis via Activation of the cAMP/PKA/HSL Pathway in 3T3-L1 Adipocytes
Source: MDPI journal article supplement (doi:10.3390/foods12101947), 2023-05-10
Supplement: s1 [file s1]

**Supplementary information**

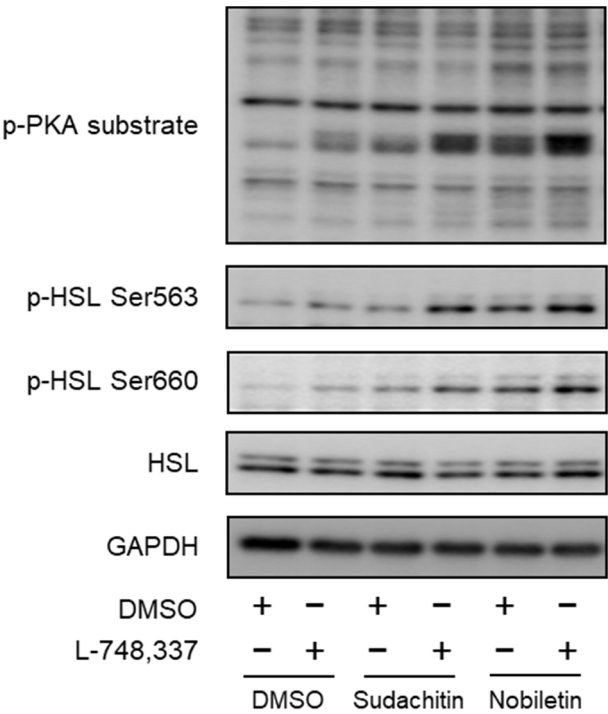

**Supplementary Figure S1.** Effects of  $\beta_3$ -adrenergic receptor-selective antagonist on sudachitin- and nobiletin-induced phosphorylation of the PKA substrate and HSL. Protein expression of PKA substrate and HSL phosphorylated at Ser563, HSL phosphorylated at Ser660, total HSL, and GAPDH. 3T3-L1 adipocytes are treated with DMSO (0.5  $\mu$ L/mL) or L-748,337 (20  $\mu$ M) and before treatment with DMSO (0.5  $\mu$ L/mL), sudachitin or nobiletin (30  $\mu$ M). DMSO, dimethyl sulfoxide; GAPDH, glyceraldehyde 3-phosphate dehydrogenase; HSL, hormone-sensitive lipase; PKA, protein kinase A.
